# Supplementary material for: B-Doped 2D-InSe as a bifunctional catalyst for CO2/CH4separation under the regulation of an external electric field
Source: Royal Society of Chemistry journal article supplement (doi:10.1039/d1cp03943a), 2021-01-01
Supplement: d1cp03943a1.pdf [file d1cp03943a1.pdf]

## B doped 2D-InSe as a bifunctional catalyst for CO<sub>2</sub>/CH<sub>4</sub> separation under the regulation of external electric field

Chenxu Zhao, Houyong Yang, Jinrong Huo, Chaozheng He\*

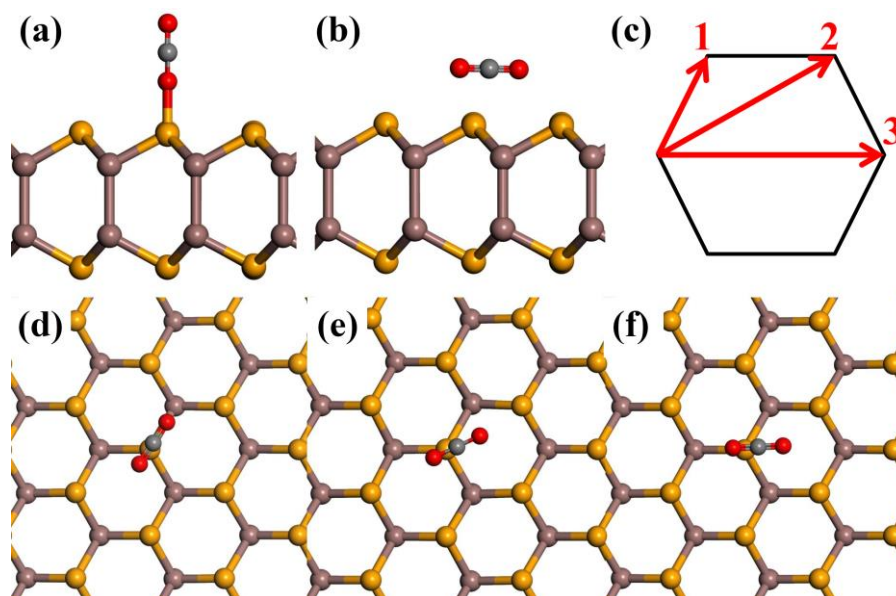

Fig. S1 The side view of (a) vertical and (b) parallel adsorption of CO<sub>2</sub>; (c) indicates the schematic diagram of different orientation; (d), (e), and (f) denote the top view of CO<sub>2</sub> parallel adsorption with C-O bond pointing to different atoms in the hexagonal unit.

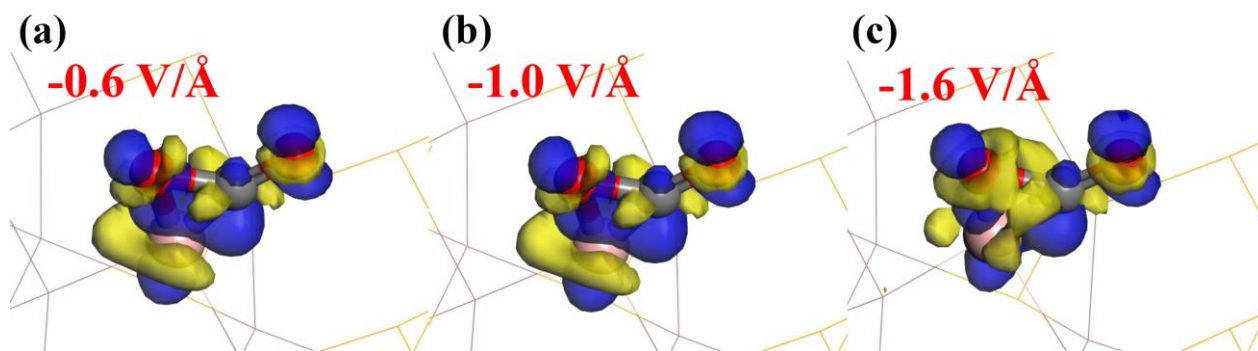

Fig. S2 The charge density difference of CO<sub>2</sub>-B@2DInSe complex at electric fields of (a) -0.6, (b) -1.0, and (c) -1.6 V/Å respectively.

Tab. S1 The adsorption energies of CO<sub>2</sub> ( $E_{ad}[CO_2]$ ) in different manners on 2D InSe, v-2DInSe, and B@2DInSe surfaces respectively with various manners. The serial numbers for the parallel manners corresponds to the numbers in Fig. S1 (c). The values labeled in red denote the optimal situations for each system.

|          | $E_{ad}[CO_2]$ (eV) |            |              |              |
|----------|---------------------|------------|--------------|--------------|
|          | Vertical            | Parallel 1 | Parallel 2   | Parallel 3   |
| 2D InSe  | 0.00                | -0.02      | <b>-0.05</b> | -0.03        |
| v-2DInSe | <b>-0.16</b>        | -0.07      | -0.08        | -0.09        |
| B@2DInSe | -0.13               | -0.50      | -0.47        | <b>-0.52</b> |

Tab. S2 The adsorption energies of CO<sub>2</sub> ( $E_{\text{ad}}[\text{CO}_2]$ ) and CH<sub>4</sub> ( $E_{\text{ad}}[\text{CH}_4]$ ) at different electric field (EF)

| EF(V/Å) | 2D InSe (eV)                 |                              | v-2DInSe (eV)                |                              | B@2DInSe (eV)                |                              |
|---------|------------------------------|------------------------------|------------------------------|------------------------------|------------------------------|------------------------------|
|         | $E_{\text{ad}}[\text{CO}_2]$ | $E_{\text{ad}}[\text{CH}_4]$ | $E_{\text{ad}}[\text{CO}_2]$ | $E_{\text{ad}}[\text{CH}_4]$ | $E_{\text{ad}}[\text{CO}_2]$ | $E_{\text{ad}}[\text{CH}_4]$ |
| -2      |                              | -0.27                        | 0.54                         | 0.31                         |                              | 0.16                         |
| -1.9    |                              | -0.45                        |                              |                              |                              |                              |
| -1.8    |                              |                              | -0.02                        | -0.23                        | 0.70                         | -0.30                        |
| -1.7    |                              | -0.82                        |                              | -0.49                        | 0.38                         |                              |
| -1.6    |                              | -0.92                        | -0.38                        | -0.60                        | 0.02                         | -0.64                        |
| -1.5    | 0.07                         |                              | -0.56                        |                              | -0.25                        | -0.66                        |
| -1.4    | -0.10                        |                              | -0.55                        |                              | -0.46                        | -0.74                        |
| -1.3    | -0.18                        | -0.70                        | -0.58                        |                              | -0.64                        | -0.67                        |
| -1.2    | -0.20                        | -0.52                        | -0.55                        | -0.51                        | -0.76                        | -0.52                        |
| -1.1    | -0.10                        |                              |                              |                              |                              |                              |
| -1.0    | -0.04                        | -0.15                        | -0.27                        | -0.23                        | -0.79                        |                              |
| -0.9    |                              |                              |                              |                              | -0.78                        |                              |
| -0.8    | -0.04                        | -0.02                        | -0.08                        | -0.06                        | -0.77                        | -0.08                        |
| -0.7    | -0.02                        |                              |                              |                              |                              |                              |
| -0.6    | -0.03                        |                              | -0.10                        |                              | -0.68                        |                              |
| -0.5    | -0.01                        |                              | -0.10                        |                              |                              |                              |
| -0.4    | -0.01                        | -0.02                        | -0.11                        | -0.13                        | -0.73                        | -0.12                        |
| -0.3    |                              |                              |                              |                              |                              |                              |
| -0.2    | -0.03                        |                              | -0.12                        |                              | -0.61                        |                              |
| -0.1    |                              |                              |                              |                              |                              |                              |
| 0.0     | -0.05                        | -0.03                        | -0.16                        | -0.16                        | -0.52                        | -0.13                        |
| 0.1     |                              |                              |                              |                              |                              |                              |
| 0.2     | -0.03                        |                              | -0.13                        |                              | -0.47                        |                              |
| 0.3     |                              |                              |                              |                              |                              |                              |
| 0.4     | -0.04                        | -0.08                        | -0.13                        | -0.19                        | -0.39                        | -0.15                        |
| 0.5     |                              |                              |                              |                              |                              |                              |
| 0.6     | -0.03                        |                              | -0.14                        |                              | -0.35                        |                              |
| 0.7     |                              |                              |                              |                              |                              |                              |
| 0.8     | -0.01                        | -0.09                        | -0.16                        | -0.19                        | -0.34                        | -0.20                        |
| 0.9     | 0.00                         |                              | -0.16                        |                              | -0.31                        |                              |
| 1.0     | 0.01                         |                              | -0.16                        |                              | -0.28                        |                              |
| 1.1     |                              |                              |                              |                              |                              |                              |
| 1.2     | 0.20                         | -0.03                        | 0.08                         | -0.10                        | 0.00                         | -0.13                        |
| 1.3     | 0.48                         | 0.11                         | 0.35                         | 0.06                         | 0.31                         | 0.05                         |
| 1.4     | 0.87                         | 0.41                         |                              | 0.40                         |                              | 0.38                         |
| 1.5     |                              | 0.79                         |                              |                              |                              |                              |
